# Supplementary material
Source: Springer Nature journal article supplement (https://www.springermedizin.de/resource/supplementary/12943_2013_1231_MOESM7_ESM.pdf/9553104)

**A**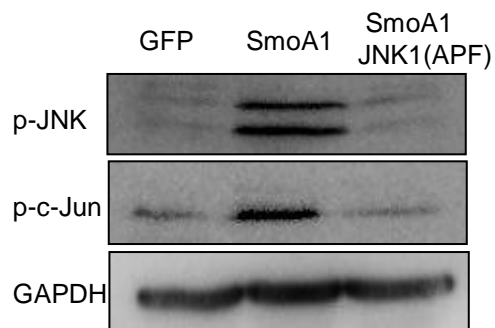**C**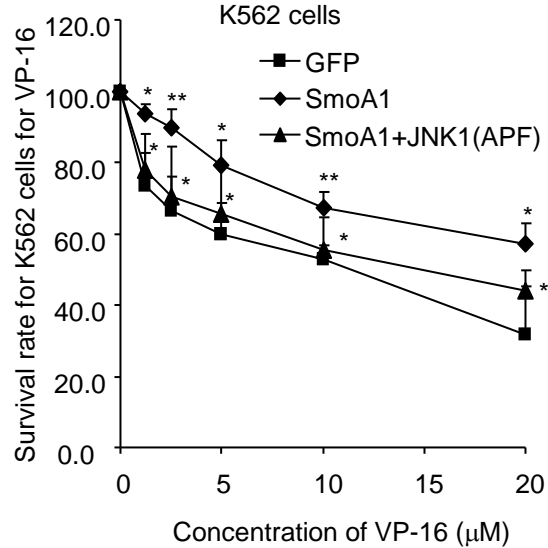**E**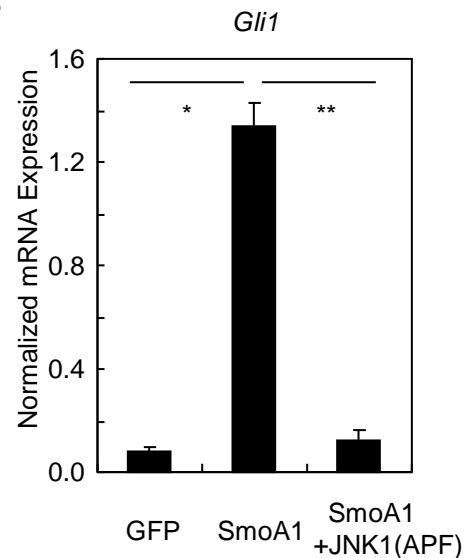**B**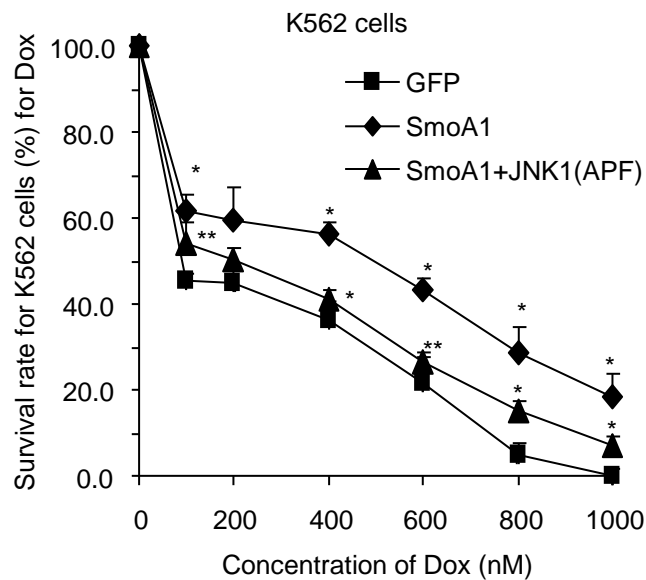**D**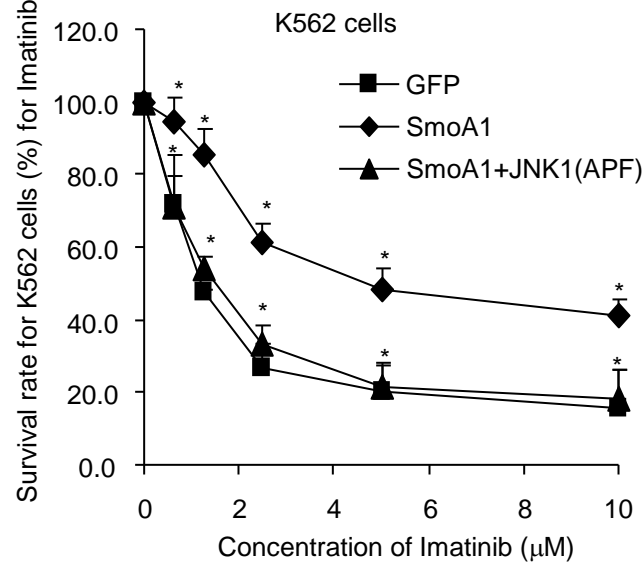

Supplement: MOESM7 [file 9553104]
